CORRECTION

# Correction: Smad3-dependent CCN2 mediates fibronectin expression in human skin dermal fibroblasts

The *PLOS ONE* Staff

Elements of [Fig 5A](#), [5B](#) and [5F](#) are incorrectly offset. Please see the corrected [Fig 5](#) here. The publisher apologizes for the error.

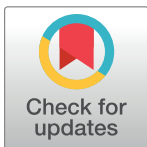

---

## OPEN ACCESS

**Citation:** The *PLOS ONE* Staff (2017) Correction: Smad3-dependent CCN2 mediates fibronectin expression in human skin dermal fibroblasts. *PLoS ONE* 12(5): e0177611. <https://doi.org/10.1371/journal.pone.0177611>

**Published:** May 9, 2017

**Copyright:** © 2017 The PLOS ONE Staff. This is an open access article distributed under the terms of the [Creative Commons Attribution License](#), which permits unrestricted use, distribution, and reproduction in any medium, provided the original author and source are credited.

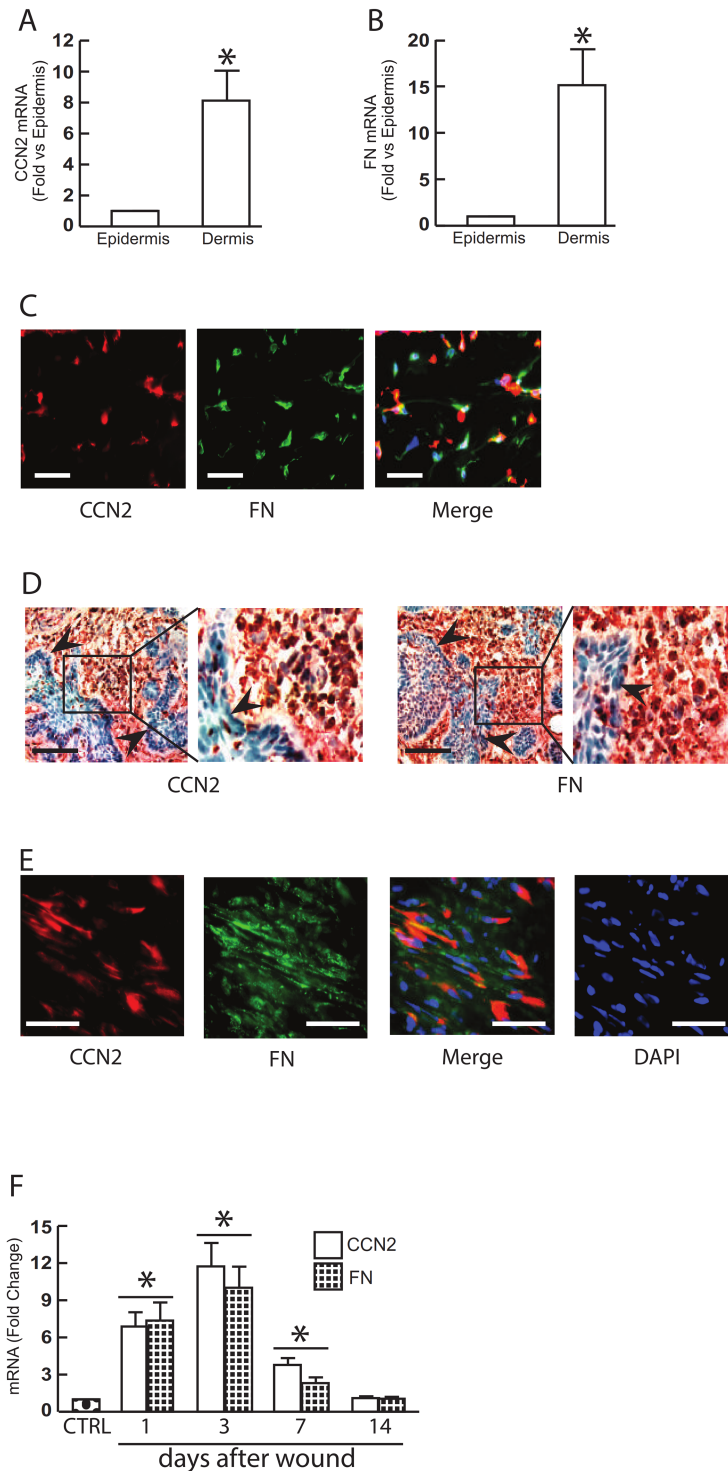

**Fig 5. CCN2 and FN are primarily expressed in the dermis of normal human skin, stromal tissues of skin SCC, and wounded human skin.** (A, B) Epidermis and dermis were captured by LCM. Total RNA was extracted from captured tissue, and mRNA levels were quantified by real-time RT-PCR. CCN2 (A) and FN (B) mRNA levels were normalized to the housekeeping gene 36B4, as an internal control for quantification. Data are relative levels to 36B4 (mean±SEM), N = 6, \*p<0.05. (C) Double immunostaining for CCN2 and FN in normal human skin. OCT-embedded normal human skin sections (7µm) were co-immunofluorescence stained with CCN2 and FN. Representative of six individuals. Bar = 50µm. (D) Expression of CCN2 and FN in the stromal tissues of SCC was determined by immunohistology. Arrow heads indicate tumor islands.

Representative of five SCC. Bar = 100 $\mu$ m. (E) Double immunostaining for CCN2 and FN. Representative of six individuals. Bar = 50 $\mu$ m. (F) Partial thickness wounds were made in forearm skin of healthy adult individuals by CO<sub>2</sub> laser (see Methods for details). Skin samples were obtained at indicated times, and mRNA levels were quantified by real-time RT-PCR. CCN2 and FN mRNA levels were normalized to the housekeeping gene 36B4, as an internal control for quantification. Mean $\pm$ SEM, N = 6, \*p<0.05 vs control.

<https://doi.org/10.1371/journal.pone.0177611.g001>

## Reference

1. Purohit T, Qin Z, Quan C, Lin Z, Quan T (2017) Smad3-dependent CCN2 mediates fibronectin expression in human skin dermal fibroblasts. PLoS ONE 12(3): e0173191. <https://doi.org/10.1371/journal.pone.0173191> PMID: 28267785
